# Supplementary material for: Oxide phosphors for efficient light upconversion: Yb3+ and Er3+ co-doped Ln2BaZnO5 (Ln = Y, Gd)
Source: Royal Society of Chemistry journal article supplement (doi:10.1039/c000127a), 2010-01-01
Supplement: c000127a.pdf [file c000127a.pdf]

Supplementary Material (ESI) for Journal of Materials Chemistry.

This journal is (c) The Royal Society of Chemistry 2010

## Oxide Phosphors for Light Upconversion; Yb<sup>3+</sup> and Er<sup>3+</sup> Co-Doped Ln<sub>2</sub>BaZnO<sub>5</sub> (Ln=Y, Gd)

Isabelle Etchart<sup>ab</sup>, Arnaud Huignard<sup>b</sup>, Mathieu Bérard<sup>b</sup>, Muhammad N. Nordin<sup>c</sup>, Ignacio Hernández<sup>d</sup>, Richard J. Curry<sup>c</sup>, William P. Gillin<sup>d</sup>, and Anthony K. Cheetham<sup>a\*</sup>

<sup>a</sup> Materials Science and Metallurgy Department, University of Cambridge, Pembroke Street CB2 3QZ, UK

<sup>b</sup> Saint-Gobain Recherche, 39 quai Lucien Lefranc, 93303 Aubervilliers, France

<sup>c</sup> Advanced Technology Institute, University of Surrey, Guildford, Surrey GU2 7XH, UK

<sup>d</sup> Department of Physics, Queen Mary University of London, Mile End Road, London, E1 4NS, UK

\* Corresponding author. E-mail: akc30@cam.ac.uk

### Electronic Supplementary Information (ESI)

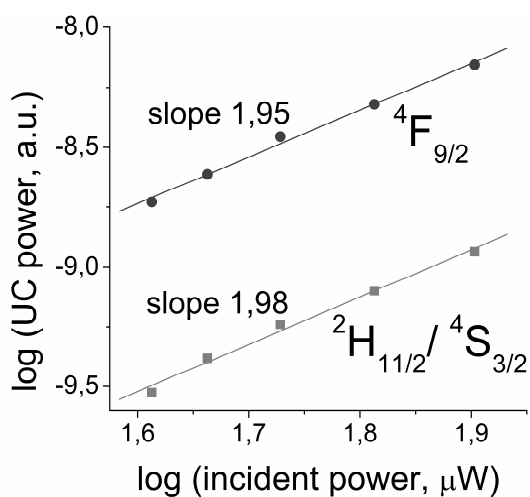

**Fig. S1:** Pump power dependence of the green  ${}^2\text{H}_{11/2}/{}^4\text{S}_{3/2} \rightarrow {}^4\text{I}_{15/2}$  and red  ${}^4\text{F}_{9/2} \rightarrow {}^4\text{I}_{15/2}$  emissions at room temperature under 977 nm excitation.
